# Supplementary material for: An unprecedented organic–inorganic hybrid based on the first {Nb10V4O40(OH)2}12−clusters and copper cations
Source: Royal Society of Chemistry journal article supplement (doi:10.1039/c1cc15684e), 2011-11-05
Supplement: c1cc15684e.pdf [file c1cc15684e.pdf]

## Supplementary Information

### **An Unprecedented Organic-Inorganic Hybrid Based on the first $\{\text{Nb}_{10}\text{V}_4\text{O}_{40}(\text{OH})_2\}^{12-}$ Clusters and Copper Cations<sup>†‡</sup>**

Peng Huang, Chao Qin, Xin-Long Wang\*, Chun-Yi Sun, Guang-Sheng Yang, Kui-Zhan Shao, Yan-Qing Jiao, Kun Zhou and Zhong-Min Su\*

Institute of Functional Material Chemistry, Key Lab of Polyoxometalate, Science of Ministry of Education, Faculty of Chemistry, Northeast Normal University, Changchun, 130024 Jilin, People's Republic of China. *Fax:* +86-431-85684009; *Tel:* +86-431-85099108. *E-mail:* [zmsu@nenu.edu.cn](mailto:zmsu@nenu.edu.cn).

## 1. Materials and Methods

All the chemicals were obtained from commercial sources, and were used without further purification. Elemental analyses (C, H and N) were measured on a Perkin-Elmer 2400 CHN elemental analyzer; Nb, V and Cu were determined with a Plasma-SPEC(I) ICP atomic emission spectrometer. IR spectrum was performed in the range 4000–400  $\text{cm}^{-1}$  using KBr pellets on an Alpha Centaur FT/IR spectrophotometer. Powder X-ray diffraction measurement was recorded radiation ranging from 5 to 50° at room temperature on a Siemens D5005 diffractometer with Cu-K $\alpha$  ( $\lambda = 1.5418 \text{ \AA}$ ). Thermogravimetric analysis (TGA) of the samples was performed using a Perkin-Elmer TG-7 analyzer heated from room temperature to 900 °C under nitrogen at the heating rate of 5 °C·min $^{-1}$ .

## 2. Synthesis

Syntheses of **1**:  $\text{K}_7\text{HfNb}_6\text{O}_{19}\cdot 13\text{H}_2\text{O}$  was prepared according to the literature method<sup>1</sup> and identified by IR spectra. 1,10-phenanthroline (0.099 g, 0.50 mmol) was added to the solution of  $\text{Cu}(\text{Ac})_2\cdot 3\text{H}_2\text{O}$  (0.242 g, 1.00 mmol) in water (10 mL) under stirring. Then the resulting blue solution was added dropwise to the solution of  $\text{K}_7\text{HfNb}_6\text{O}_{19}\cdot 13\text{H}_2\text{O}$  (1.370 g, 1.00 mmol) and  $\text{NaVO}_3\cdot 2\text{H}_2\text{O}$  (0.3159 g, 2.00 mmol) in water (80 mL) under stirring. Subsequently, the mixture was adjusted to pH 11.2 using NaOH (1 molL $^{-1}$ ) solution, condensed to 50 mL at 58 °C for 8 h, filtered and then transferred to a straight glass tube. Over a period of 6 weeks, block-shaped light-blue single crystals for X-ray crystallography were obtained, washed with distilled water and then air-dried to give **1** in 57% yield (based on  $\text{K}_7\text{HfNb}_6\text{O}_{19}\cdot 13\text{H}_2\text{O}$ ). Elemental analysis: Anal. Calc.: H 2.01; Nb 27.00; V 5.92; Cu 11.08; C 25.11; N 4.88. Found: H 1.92; Nb 27.53; V 5.88; Cu 11.76; C 25.04; N 5.21%.

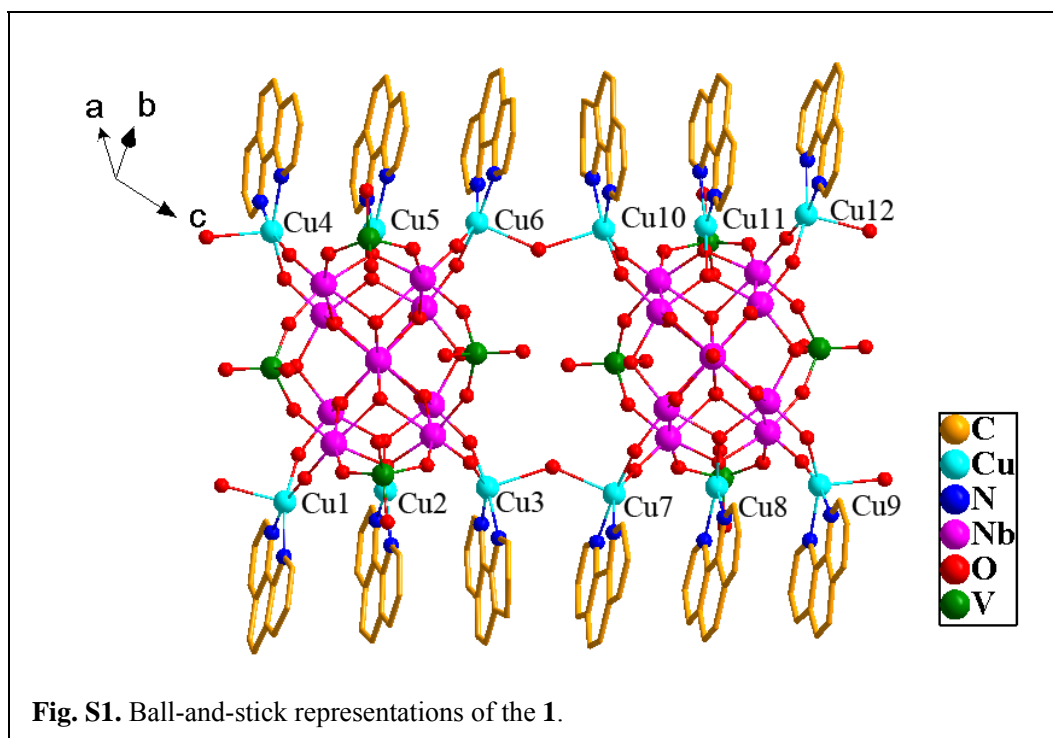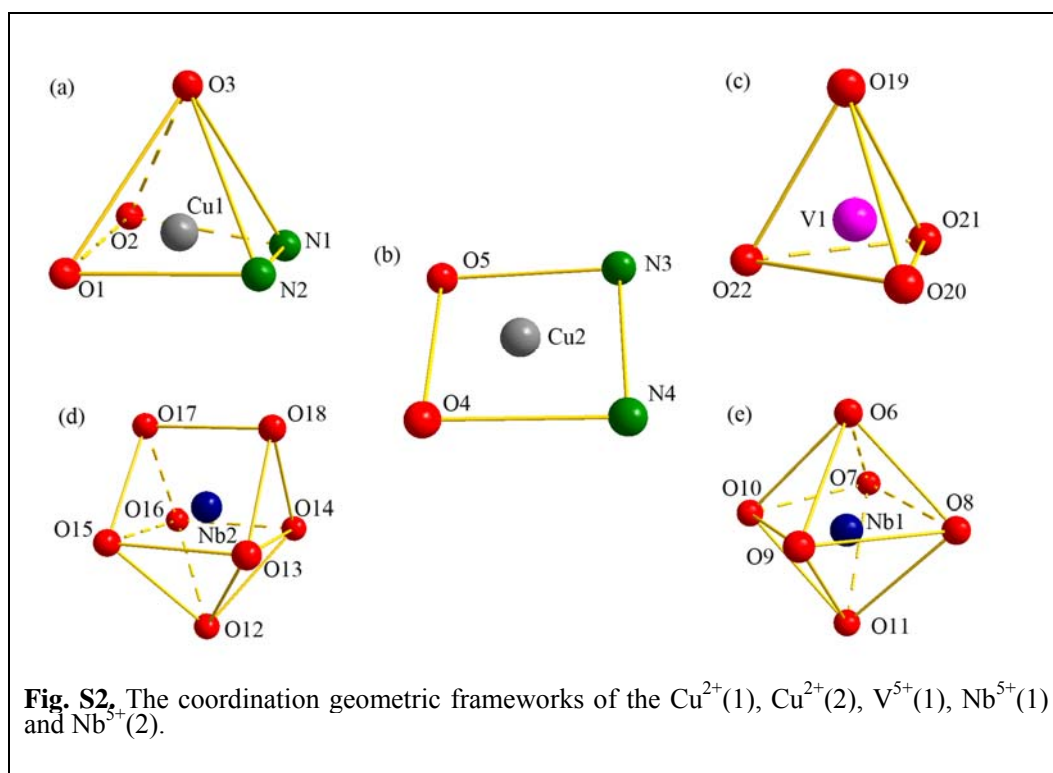

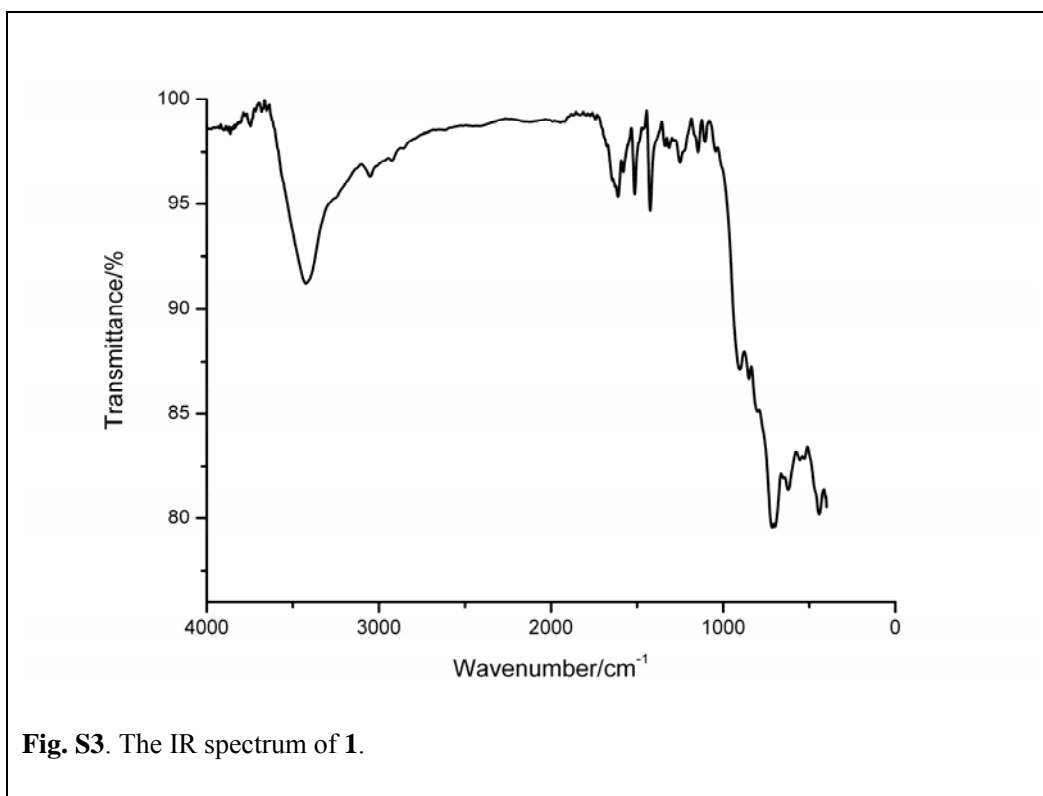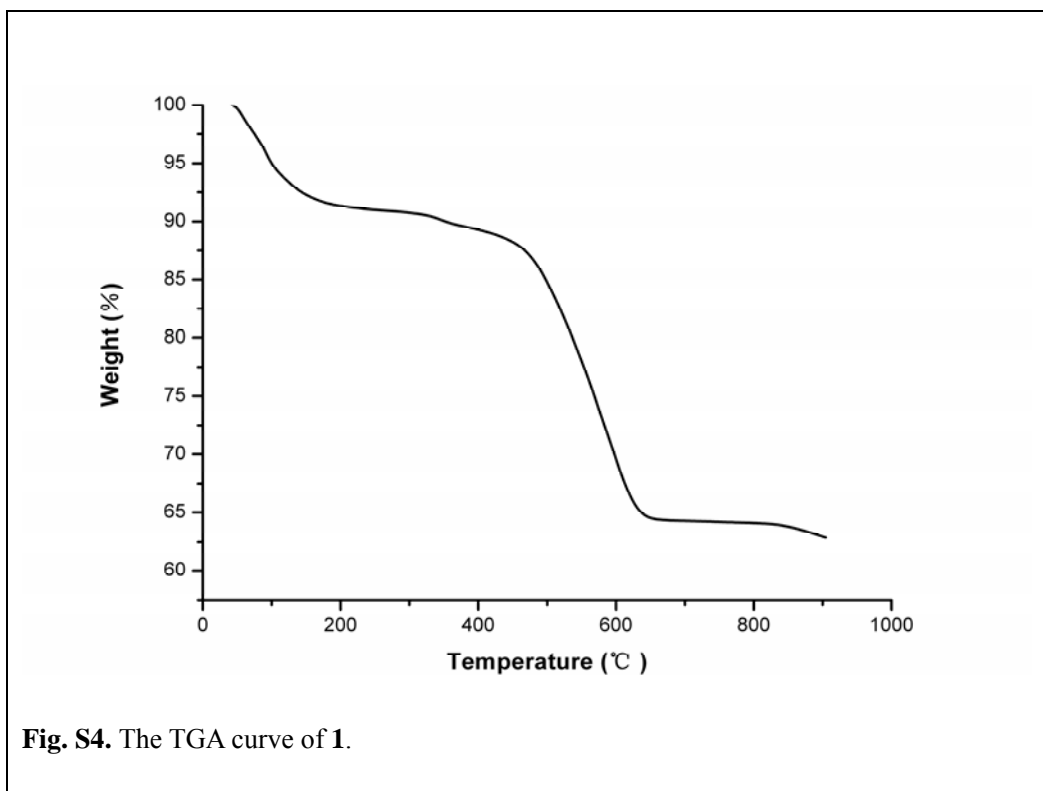

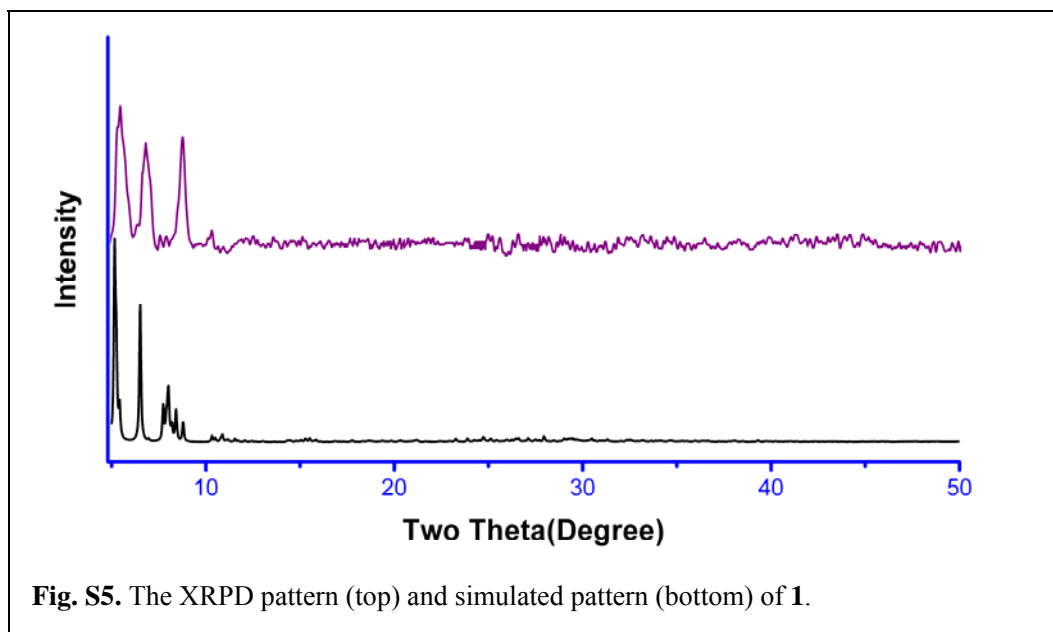

### References

- 1 M. Filowitz, R. K. C. Ho, W. G. Klemperer, W. Shum, *Inorg. Chem.*, 1979, **18**, 93.
